# Supplementary material
Source: ML conference proceedings conference paper supplement (https://proceedings.mlr.press/v37/yuan15.html)
Supplement: Supplementary file 2 [file yuan15-supp.zip]

| factor 14    | factor 9     | factor 5     | factor 4     |
|--------------|--------------|--------------|--------------|
| ILMN_2114568 | ILMN_1734205 | ILMN_1781373 | ILMN_3201221 |
| ILMN_2337655 | ILMN_1681644 | ILMN_1795181 | ILMN_2094166 |
| ILMN_1690105 | ILMN_2384122 | ILMN_1683792 | ILMN_1756139 |
| ILMN_1776157 | ILMN_3295494 | ILMN_1736729 | ILMN_3235013 |
| ILMN_1727271 | ILMN_1798270 | ILMN_3240420 | ILMN_1703005 |
| ILMN_1750321 | ILMN_1693009 | ILMN_1799467 | ILMN_1692956 |
| ILMN_2321416 | ILMN_1740633 | ILMN_2053527 | ILMN_3240236 |
| ILMN_2176063 | ILMN_1724493 | ILMN_2331163 | ILMN_3276019 |
| ILMN_1771385 | ILMN_2367753 | ILMN_1760062 | ILMN_2166865 |
| ILMN_2415179 | ILMN_2352097 | ILMN_1783684 | ILMN_1693490 |
| ILMN_1669206 | ILMN_1692295 | ILMN_3295494 | ILMN_2168952 |
| ILMN_1679428 | ILMN_1660732 | ILMN_1708164 | ILMN_1726308 |
| ILMN_1691364 | ILMN_1808395 | ILMN_2074860 | ILMN_1732534 |
| ILMN_1774077 | ILMN_1701114 | ILMN_1657871 | ILMN_3265143 |
| ILMN_1726574 | ILMN_1683792 | ILMN_2388547 | ILMN_2130180 |
| ILMN_1660368 | ILMN_1760509 | ILMN_1683678 | ILMN_3225121 |
| ILMN_1785732 | ILMN_1725534 | ILMN_2369682 | ILMN_1778202 |
| ILMN_1712888 | ILMN_2114568 | ILMN_1745397 | ILMN_3294222 |
| ILMN_1654389 | ILMN_1780806 | ILMN_1654516 | ILMN_1736888 |
| ILMN_1775522 | ILMN_1776157 | ILMN_1679093 | ILMN_3239895 |
| ILMN_1775939 | ILMN_2073184 | ILMN_2121437 | ILMN_3235148 |
| ILMN_1761721 | ILMN_1761945 | ILMN_2148785 | ILMN_1668228 |
| ILMN_1651433 | ILMN_2269564 | ILMN_1776347 | ILMN_1658416 |
| ILMN_1799848 | ILMN_1771385 | ILMN_2239754 | ILMN_2181241 |
| ILMN_1693630 | ILMN_1767894 | ILMN_1742618 | ILMN_2348093 |
| ILMN_3247506 | ILMN_1676385 | ILMN_1694177 | ILMN_1768784 |
| ILMN_1786612 | ILMN_1680618 | ILMN_2142554 | ILMN_2054554 |
| ILMN_1696643 | ILMN_2148785 | ILMN_2233783 | ILMN_1675852 |
| ILMN_3274904 | ILMN_1703335 | ILMN_1723912 | ILMN_2303170 |
| ILMN_1777565 | ILMN_1653220 | ILMN_1674063 | ILMN_1804938 |
| ILMN_1657612 | ILMN_1682993 | ILMN_1782579 | ILMN_1772929 |
| ILMN_1702787 | ILMN_1786211 | ILMN_3226505 | ILMN_3267017 |
| ILMN_1691717 | ILMN_2095840 | ILMN_1765829 | ILMN_1659437 |
| ILMN_1793729 | ILMN_1765825 | ILMN_1784737 | ILMN_1815578 |
| ILMN_2413508 | ILMN_2342835 | ILMN_1701114 | ILMN_2405521 |
| ILMN_1734742 | ILMN_1674789 | ILMN_1710937 | ILMN_1689725 |
| ILMN_2373062 | ILMN_1799848 | ILMN_2059535 | ILMN_2305544 |
| ILMN_1801348 | ILMN_1809467 | ILMN_1664543 | ILMN_2117569 |
| ILMN_1788931 | ILMN_1680579 | ILMN_2173975 | ILMN_1680967 |
| ILMN_2164242 | ILMN_2087702 | ILMN_1690105 | ILMN_2119945 |
| ILMN_1777325 | ILMN_2405078 | ILMN_1695962 | ILMN_1744713 |
| ILMN_2132599 | ILMN_1717934 | ILMN_1835092 | ILMN_1655377 |
| ILMN_3237966 | ILMN_2321416 | ILMN_3238435 | ILMN_1755114 |
| ILMN_1742450 | ILMN_1715131 | ILMN_1788931 | ILMN_1706305 |
| ILMN_1670305 | ILMN_2132599 | ILMN_1795835 | ILMN_1749984 |
| ILMN_2078697 | ILMN_1813338 | ILMN_2170814 | ILMN_1703720 |

|              |              |              |              |
|--------------|--------------|--------------|--------------|
| ILMN_2395728 | ILMN_1749591 | ILMN_1808395 | ILMN_3247256 |
| ILMN_1673738 | ILMN_1669424 | ILMN_1814526 | ILMN_1688490 |
| ILMN_1683792 | ILMN_1719756 | ILMN_1814305 | ILMN_1804350 |
| ILMN_2261600 | ILMN_2261600 | ILMN_1832879 | ILMN_3233239 |
| ILMN_1758250 | ILMN_1703108 | ILMN_1672356 | ILMN_1714765 |
| ILMN_1753547 | ILMN_1694213 | ILMN_1747630 | ILMN_1712914 |
| ILMN_1802380 | ILMN_2376108 | ILMN_2201533 | ILMN_2136133 |
| ILMN_1704537 | ILMN_3245066 | ILMN_1771385 | ILMN_2106658 |
| ILMN_3241834 | ILMN_1731233 | ILMN_1703949 | ILMN_3274790 |
| ILMN_1683475 | ILMN_1773352 | ILMN_1767514 | ILMN_3283449 |
| ILMN_2387553 | ILMN_2176063 | ILMN_1745242 | ILMN_3244319 |
| ILMN_3211906 | ILMN_2337655 | ILMN_1685170 | ILMN_3302896 |
| ILMN_1706057 | ILMN_1767006 | ILMN_3244065 | ILMN_2342033 |
| ILMN_1707077 | ILMN_1686555 | ILMN_2117987 | ILMN_1905548 |
| ILMN_2339835 | ILMN_1780898 | ILMN_1734855 | ILMN_1793829 |
| ILMN_1761159 | ILMN_1778242 | ILMN_1654518 | ILMN_1690114 |
| ILMN_1772644 | ILMN_1660629 | ILMN_1809583 | ILMN_1677906 |
| ILMN_3295847 | ILMN_1800897 | ILMN_1811909 | ILMN_1673421 |
| ILMN_3290199 | ILMN_1676600 | ILMN_2330861 | ILMN_1756152 |
| ILMN_1738677 | ILMN_2415179 | ILMN_1712705 | ILMN_3235180 |
| ILMN_2406501 | ILMN_2191313 | ILMN_2357770 | ILMN_3283470 |
| ILMN_1721888 | ILMN_1716276 | ILMN_3198247 | ILMN_1719415 |
| ILMN_1782579 | ILMN_1784287 | ILMN_1813604 | ILMN_1655316 |
| ILMN_1745148 | ILMN_1690105 | ILMN_1812759 | ILMN_1719032 |
| ILMN_1741942 | ILMN_1734742 | ILMN_3268914 | ILMN_1745885 |
| ILMN_1667883 | ILMN_1764087 | ILMN_3200299 | ILMN_2151818 |
| ILMN_2318725 | ILMN_2066849 | ILMN_1731224 | ILMN_1677691 |
| ILMN_1788108 | ILMN_1660462 | ILMN_1771320 | ILMN_1757186 |
| ILMN_1674661 | ILMN_1695917 | ILMN_1760676 | ILMN_2123559 |
| ILMN_2224143 | ILMN_1697971 | ILMN_1809086 | ILMN_1654268 |
| ILMN_1792689 | ILMN_2393296 | ILMN_2038772 | ILMN_1711073 |
| ILMN_1755115 | ILMN_1697554 | ILMN_2410516 | ILMN_2234758 |
| ILMN_1783709 | ILMN_1751034 | ILMN_1806040 | ILMN_1654320 |
| ILMN_1701114 | ILMN_1653652 | ILMN_2041101 | ILMN_2110908 |
| ILMN_2243553 | ILMN_2059886 | ILMN_1705302 | ILMN_1738482 |
| ILMN_1768194 | ILMN_1664543 | ILMN_2388955 | ILMN_3276971 |
| ILMN_3264073 | ILMN_1808501 | ILMN_1814998 | ILMN_1669663 |
| ILMN_1741200 | ILMN_1681239 | ILMN_2212763 | ILMN_1702055 |
| ILMN_1690963 | ILMN_1724066 | ILMN_1786612 | ILMN_1797793 |
| ILMN_1682938 | ILMN_2249920 | ILMN_1719749 | ILMN_1776347 |
| ILMN_2064606 | ILMN_1691731 | ILMN_2060115 | ILMN_2119937 |
| ILMN_2173451 | ILMN_1670305 | ILMN_3282983 | ILMN_2038776 |
| ILMN_1713978 | ILMN_2412807 | ILMN_1720241 | ILMN_1748819 |
| ILMN_1789596 | ILMN_3297945 | ILMN_1687768 | ILMN_3230608 |
| ILMN_2343048 | ILMN_1769782 | ILMN_2181540 | ILMN_2122103 |
| ILMN_1676588 | ILMN_1779324 | ILMN_1783424 | ILMN_1678757 |
| ILMN_1683026 | ILMN_1654389 | ILMN_1711994 | ILMN_1784300 |

|              |              |              |              |
|--------------|--------------|--------------|--------------|
| ILMN_2412807 | ILMN_1781373 | ILMN_2408039 | ILMN_3225102 |
| ILMN_1807994 | ILMN_1763000 | ILMN_2096012 | ILMN_2161286 |
| ILMN_1655710 | ILMN_2147105 | ILMN_1663347 | ILMN_2279834 |
| ILMN_1754195 | ILMN_1670570 | ILMN_2381899 | ILMN_1671837 |
| ILMN_3188076 | ILMN_1723944 | ILMN_1703327 | ILMN_1726460 |
| ILMN_3301324 | ILMN_1708041 | ILMN_1783226 | ILMN_1736002 |
| ILMN_3241091 | ILMN_1708348 | ILMN_3211935 | ILMN_3305993 |
| ILMN_3275447 | ILMN_2391051 | ILMN_2157075 | ILMN_2383107 |
| ILMN_1707503 | ILMN_1774733 | ILMN_1661346 | ILMN_3262849 |
| ILMN_2360784 | ILMN_1692464 | ILMN_1783753 | ILMN_2388155 |
| ILMN_1667966 | ILMN_3235176 | ILMN_1812618 | ILMN_2407851 |
| ILMN_1770412 | ILMN_1786612 | ILMN_2374293 | ILMN_3249658 |
| ILMN_1653205 | ILMN_1682428 | ILMN_2395728 | ILMN_3238053 |
| ILMN_1725471 | ILMN_1696021 | ILMN_1652787 | ILMN_1712678 |
| ILMN_1738675 | ILMN_1777519 | ILMN_2411963 | ILMN_3231944 |
| ILMN_1691506 | ILMN_1725471 | ILMN_3177285 | ILMN_1775011 |
| ILMN_1762764 | ILMN_1689908 | ILMN_1728724 | ILMN_2053538 |
| ILMN_1761566 | ILMN_2152581 | ILMN_3208715 | ILMN_1651228 |
| ILMN_1722872 | ILMN_3235832 | ILMN_2415144 | ILMN_3294213 |
| ILMN_1751079 | ILMN_1669447 | ILMN_1797005 | ILMN_1691053 |
| ILMN_1712155 | ILMN_1683609 | ILMN_1660063 | ILMN_1661346 |
| ILMN_1664525 | ILMN_1738749 | ILMN_2202940 | ILMN_3246255 |
| ILMN_1735552 | ILMN_1791759 | ILMN_1745778 | ILMN_1736008 |
| ILMN_1676600 | ILMN_1696643 | ILMN_1653220 | ILMN_2106656 |
| ILMN_1714599 | ILMN_1659158 | ILMN_1739428 | ILMN_1912662 |
| ILMN_1809889 | ILMN_1669692 | ILMN_2415722 | ILMN_1771903 |
| ILMN_2393296 | ILMN_1796235 | ILMN_1748770 | ILMN_1766851 |
| ILMN_1703617 | ILMN_1709348 | ILMN_1767747 | ILMN_1691181 |
| ILMN_3226875 | ILMN_1810289 | ILMN_2410826 | ILMN_1812312 |
| ILMN_3202673 | ILMN_2353732 | ILMN_1804117 | ILMN_2152257 |
| ILMN_1811049 | ILMN_1803819 | ILMN_1707695 | ILMN_3275672 |
| ILMN_1726603 | ILMN_1658399 | ILMN_1708414 | ILMN_2273224 |
| ILMN_1768284 | ILMN_1785202 | ILMN_1690077 | ILMN_1716895 |
| ILMN_1652955 | ILMN_1713491 | ILMN_1776157 | ILMN_2321931 |
| ILMN_2087702 | ILMN_3247506 | ILMN_2160929 | ILMN_2370135 |
| ILMN_3238640 | ILMN_1785570 | ILMN_2180682 | ILMN_2371590 |
| ILMN_2148785 | ILMN_1738677 | ILMN_1680129 | ILMN_1682098 |
| ILMN_1655077 | ILMN_1666594 | ILMN_1705241 | ILMN_3234993 |
| ILMN_3200539 | ILMN_1761733 | ILMN_1814074 | ILMN_2062381 |
| ILMN_1711030 | ILMN_1748770 | ILMN_1752340 | ILMN_2395728 |
| ILMN_1669484 | ILMN_1697864 | ILMN_1799030 | ILMN_2233050 |
| ILMN_3295494 | ILMN_2173975 | ILMN_2351298 | ILMN_2198376 |
| ILMN_2320853 | ILMN_1710124 | ILMN_2371590 | ILMN_3223500 |
| ILMN_1723177 | ILMN_2377174 | ILMN_1715173 | ILMN_3261439 |
| ILMN_1654151 | ILMN_3240222 | ILMN_1791478 | ILMN_1743046 |
| ILMN_1663416 | ILMN_2131828 | ILMN_1730734 | ILMN_1716014 |
| ILMN_2229242 | ILMN_2409754 | ILMN_1654639 | ILMN_1708016 |

|              |              |              |              |
|--------------|--------------|--------------|--------------|
| ILMN_3223126 | ILMN_2338323 | ILMN_1812191 | ILMN_1731224 |
| ILMN_1719032 | ILMN_1659895 | ILMN_2359453 | ILMN_1749722 |
| ILMN_1676448 | ILMN_2175894 | ILMN_1779015 | ILMN_1788095 |
| ILMN_1808661 | ILMN_2316236 | ILMN_1731194 | ILMN_3302499 |
| ILMN_3301440 | ILMN_1796316 | ILMN_1693650 | ILMN_3227315 |
| ILMN_1794017 | ILMN_2300695 | ILMN_2109156 | ILMN_1738150 |
| ILMN_1655765 | ILMN_1743476 | ILMN_2077094 | ILMN_3200362 |
| ILMN_1732328 | ILMN_1745075 | ILMN_1729749 | ILMN_2055310 |
| ILMN_1771593 | ILMN_3246766 | ILMN_1695404 | ILMN_1731203 |
| ILMN_1689908 | ILMN_2320330 | ILMN_1778723 | ILMN_2204909 |
| ILMN_1763080 | ILMN_1668559 | ILMN_1779886 | ILMN_1814305 |
| ILMN_1692473 | ILMN_1768482 | ILMN_3251733 | ILMN_2415979 |
| ILMN_1791332 | ILMN_2122511 | ILMN_3300972 | ILMN_1814039 |
| ILMN_1768127 | ILMN_1815168 | ILMN_1777325 | ILMN_2048811 |
| ILMN_1747195 | ILMN_1701455 | ILMN_2054019 | ILMN_1801633 |
| ILMN_3279306 | ILMN_2406501 | ILMN_1673788 | ILMN_1872419 |
| ILMN_3202734 | ILMN_2284998 | ILMN_1701655 | ILMN_3231881 |
| ILMN_3238196 | ILMN_1720241 | ILMN_1779252 | ILMN_3289352 |
| ILMN_1694587 | ILMN_1793915 | ILMN_2351611 | ILMN_1657932 |
| ILMN_1737947 | ILMN_1748578 | ILMN_1712389 | ILMN_1759954 |
| ILMN_1719303 | ILMN_2185845 | ILMN_1730575 | ILMN_1680314 |
| ILMN_3193623 | ILMN_2414325 | ILMN_2378048 | ILMN_1721349 |
| ILMN_1728845 | ILMN_2390299 | ILMN_1724700 | ILMN_3224907 |
| ILMN_1758623 | ILMN_1731418 | ILMN_1791702 | ILMN_3275590 |
| ILMN_1693394 | ILMN_1709164 | ILMN_1708502 | ILMN_3261345 |
| ILMN_1692295 | ILMN_2079386 | ILMN_1746836 | ILMN_3287996 |
| ILMN_3307648 | ILMN_1739942 | ILMN_1792679 | ILMN_2059173 |
| ILMN_1696087 | ILMN_2327860 | ILMN_1680109 | ILMN_2105033 |
| ILMN_3298215 | ILMN_1696843 | ILMN_1691731 | ILMN_3206804 |
| ILMN_1663954 | ILMN_1805064 | ILMN_1686871 | ILMN_1697735 |
| ILMN_1690939 | ILMN_1781207 | ILMN_1750401 | ILMN_2346137 |
| ILMN_1810289 | ILMN_3231390 | ILMN_2122103 | ILMN_2066020 |
| ILMN_3279219 | ILMN_1680109 | ILMN_1657153 | ILMN_3251545 |
| ILMN_1708147 | ILMN_1785732 | ILMN_1656285 | ILMN_2045419 |
| ILMN_2356838 | ILMN_1672356 | ILMN_1703108 | ILMN_1658992 |
| ILMN_3297898 | ILMN_1811117 | ILMN_1738921 | ILMN_3293367 |
| ILMN_1671621 | ILMN_1659240 | ILMN_2405078 | ILMN_1671686 |
| ILMN_1659405 | ILMN_1812759 | ILMN_1655077 | ILMN_2150294 |
| ILMN_2121437 | ILMN_1777325 | ILMN_1693287 | ILMN_1678766 |
| ILMN_1690610 | ILMN_1709233 | ILMN_1759628 | ILMN_1690706 |
| ILMN_2090558 | ILMN_1716678 | ILMN_1701455 | ILMN_1680279 |
| ILMN_3236344 | ILMN_1695034 | ILMN_2196347 | ILMN_3256004 |
| ILMN_2087060 | ILMN_2395981 | ILMN_2252309 | ILMN_1690392 |
| ILMN_1661886 | ILMN_1793549 | ILMN_1890614 | ILMN_1795181 |
| ILMN_1755391 | ILMN_2401779 | ILMN_1810838 | ILMN_3269655 |
| ILMN_1737205 | ILMN_1684943 | ILMN_1766487 | ILMN_1734895 |
| ILMN_1761797 | ILMN_1787461 | ILMN_2367469 | ILMN_2047885 |

|              |              |              |              |
|--------------|--------------|--------------|--------------|
| ILMN_1724194 | ILMN_1739794 | ILMN_1732705 | ILMN_1737308 |
| ILMN_3292056 | ILMN_1722872 | ILMN_1665148 | ILMN_1700950 |
| ILMN_1657515 | ILMN_2405521 | ILMN_1759954 | ILMN_1660186 |
| ILMN_1731546 | ILMN_2340217 | ILMN_1745374 | ILMN_2219618 |
| ILMN_3300471 | ILMN_1747622 | ILMN_1739946 | ILMN_1803788 |
| ILMN_1658283 | ILMN_1774077 | ILMN_1752285 | ILMN_2196347 |
| ILMN_1756139 | ILMN_2340052 | ILMN_2390162 | ILMN_2341952 |
| ILMN_3234831 | ILMN_1745788 | ILMN_1753243 | ILMN_2054019 |
| ILMN_1667813 | ILMN_1705737 | ILMN_1656136 | ILMN_3235006 |
| ILMN_1802708 | ILMN_1674874 | ILMN_2219556 | ILMN_2173835 |
| ILMN_1741133 | ILMN_2404385 | ILMN_2387553 | ILMN_3187425 |
| ILMN_2399896 | ILMN_1766713 | ILMN_1699570 | ILMN_2147517 |
| ILMN_3290497 | ILMN_1695311 | ILMN_2372974 | ILMN_1685774 |

| factor 12    | factor 7     | factor 19    | factor 10    |
|--------------|--------------|--------------|--------------|
| ILMN_1691402 | ILMN_1814213 | ILMN_1762713 | ILMN_2193233 |
| ILMN_1811117 | ILMN_1724493 | ILMN_2186061 | ILMN_1680453 |
| ILMN_2322498 | ILMN_1800078 | ILMN_1770161 | ILMN_2403965 |
| ILMN_1652650 | ILMN_1652825 | ILMN_1728132 | ILMN_2366041 |
| ILMN_1717197 | ILMN_1792497 | ILMN_1785424 | ILMN_1788108 |
| ILMN_1748578 | ILMN_2110751 | ILMN_1757186 | ILMN_1763000 |
| ILMN_2269564 | ILMN_1676385 | ILMN_1762972 | ILMN_1736863 |
| ILMN_1676385 | ILMN_2078547 | ILMN_1772302 | ILMN_1769082 |
| ILMN_1805064 | ILMN_2279367 | ILMN_1774874 | ILMN_1733221 |
| ILMN_2405078 | ILMN_2106656 | ILMN_1711573 | ILMN_1811049 |
| ILMN_1780806 | ILMN_1785703 | ILMN_2243308 | ILMN_1699214 |
| ILMN_2367469 | ILMN_3241626 | ILMN_1736729 | ILMN_1787345 |
| ILMN_1669692 | ILMN_1757186 | ILMN_1657515 | ILMN_1778599 |
| ILMN_1675124 | ILMN_1743476 | ILMN_1737157 | ILMN_1712888 |
| ILMN_1668374 | ILMN_1668634 | ILMN_2401779 | ILMN_1680274 |
| ILMN_2089175 | ILMN_2396020 | ILMN_3240420 | ILMN_1798181 |
| ILMN_2340217 | ILMN_1743032 | ILMN_1775257 | ILMN_1659913 |
| ILMN_1722025 | ILMN_2086095 | ILMN_1655710 | ILMN_2105441 |
| ILMN_1767514 | ILMN_1714602 | ILMN_1804798 | ILMN_2343048 |
| ILMN_1668634 | ILMN_1727709 | ILMN_1678454 | ILMN_3240375 |
| ILMN_1653652 | ILMN_1782560 | ILMN_2374164 | ILMN_1749213 |
| ILMN_2311166 | ILMN_1680109 | ILMN_1680618 | ILMN_2349061 |
| ILMN_2285713 | ILMN_3298410 | ILMN_1732923 | ILMN_1662198 |
| ILMN_1784300 | ILMN_3265797 | ILMN_1810514 | ILMN_1768016 |
| ILMN_1681644 | ILMN_2316386 | ILMN_1751400 | ILMN_1703538 |
| ILMN_1690783 | ILMN_1734740 | ILMN_3260715 | ILMN_1717934 |
| ILMN_1742824 | ILMN_1798270 | ILMN_1679185 | ILMN_1672589 |
| ILMN_2362982 | ILMN_1691188 | ILMN_1774071 | ILMN_1814213 |
| ILMN_2091920 | ILMN_1748578 | ILMN_1652073 | ILMN_2233783 |
| ILMN_2300695 | ILMN_2313926 | ILMN_1711361 | ILMN_1745788 |
| ILMN_3236021 | ILMN_1654583 | ILMN_1674983 | ILMN_1739508 |
| ILMN_3247256 | ILMN_1810275 | ILMN_1665761 | ILMN_1747622 |
| ILMN_1715991 | ILMN_1763000 | ILMN_1745242 | ILMN_1802380 |
| ILMN_2339835 | ILMN_1772929 | ILMN_1694548 | ILMN_1683277 |
| ILMN_1743290 | ILMN_3249658 | ILMN_1776678 | ILMN_1819608 |
| ILMN_2370091 | ILMN_2206188 | ILMN_1739794 | ILMN_1674250 |
| ILMN_1729453 | ILMN_1747630 | ILMN_1669927 | ILMN_1654518 |
| ILMN_1680109 | ILMN_2066849 | ILMN_2132599 | ILMN_1714108 |
| ILMN_3265742 | ILMN_2212823 | ILMN_1694259 | ILMN_1764380 |
| ILMN_2390586 | ILMN_1704537 | ILMN_2209748 | ILMN_1761260 |
| ILMN_1767281 | ILMN_1812759 | ILMN_1707088 | ILMN_1660732 |
| ILMN_1802888 | ILMN_1747622 | ILMN_1792538 | ILMN_2183510 |
| ILMN_2154322 | ILMN_1682928 | ILMN_1695157 | ILMN_1765994 |
| ILMN_1652533 | ILMN_1716678 | ILMN_1726417 | ILMN_1811489 |
| ILMN_2086095 | ILMN_2204909 | ILMN_3251610 | ILMN_1755235 |
| ILMN_1733176 | ILMN_3180420 | ILMN_1714592 | ILMN_2381397 |

|              |              |              |              |
|--------------|--------------|--------------|--------------|
| ILMN_3224290 | ILMN_1727165 | ILMN_3301440 | ILMN_2170814 |
| ILMN_2311278 | ILMN_2154322 | ILMN_2201966 | ILMN_2166865 |
| ILMN_1900734 | ILMN_1664543 | ILMN_1893633 | ILMN_1746436 |
| ILMN_2351298 | ILMN_2348093 | ILMN_1761566 | ILMN_1771233 |
| ILMN_1757742 | ILMN_2228196 | ILMN_2213136 | ILMN_2093389 |
| ILMN_1674789 | ILMN_1793651 | ILMN_2374159 | ILMN_3283680 |
| ILMN_1765825 | ILMN_3289262 | ILMN_1752591 | ILMN_1810289 |
| ILMN_1815656 | ILMN_1805064 | ILMN_1700306 | ILMN_2083066 |
| ILMN_1794588 | ILMN_1688423 | ILMN_2307740 | ILMN_2320964 |
| ILMN_1789627 | ILMN_2155322 | ILMN_3202673 | ILMN_1813455 |
| ILMN_2380418 | ILMN_2390586 | ILMN_2319910 | ILMN_2048793 |
| ILMN_1710280 | ILMN_1769299 | ILMN_1798977 | ILMN_1680397 |
| ILMN_2368713 | ILMN_1662839 | ILMN_1688959 | ILMN_2334989 |
| ILMN_2222101 | ILMN_1771376 | ILMN_1740010 | ILMN_1788017 |
| ILMN_2073543 | ILMN_2269564 | ILMN_1785095 | ILMN_1652533 |
| ILMN_1675387 | ILMN_2073543 | ILMN_1799848 | ILMN_1803811 |
| ILMN_2390821 | ILMN_2078724 | ILMN_1652185 | ILMN_1896455 |
| ILMN_1799765 | ILMN_1734205 | ILMN_1788108 | ILMN_1873838 |
| ILMN_1762764 | ILMN_1662364 | ILMN_2110908 | ILMN_2207505 |
| ILMN_1684771 | ILMN_2273224 | ILMN_1727840 | ILMN_1706502 |
| ILMN_2284998 | ILMN_1663866 | ILMN_3241051 | ILMN_1759075 |
| ILMN_1718558 | ILMN_1716014 | ILMN_1706502 | ILMN_2096116 |
| ILMN_1669424 | ILMN_3295494 | ILMN_1788607 | ILMN_3231550 |
| ILMN_1812105 | ILMN_1681644 | ILMN_1728298 | ILMN_1774733 |
| ILMN_1746314 | ILMN_2329429 | ILMN_1688152 | ILMN_2053921 |
| ILMN_1792497 | ILMN_1697735 | ILMN_2396672 | ILMN_1682428 |
| ILMN_2155322 | ILMN_1766411 | ILMN_2097421 | ILMN_2262044 |
| ILMN_2093389 | ILMN_2173975 | ILMN_1663422 | ILMN_1659240 |
| ILMN_2288483 | ILMN_1739428 | ILMN_1809931 | ILMN_1764709 |
| ILMN_3249658 | ILMN_1812105 | ILMN_2415529 | ILMN_3187425 |
| ILMN_1807304 | ILMN_1748770 | ILMN_3235853 | ILMN_1701789 |
| ILMN_1784203 | ILMN_2207505 | ILMN_1733559 | ILMN_1701696 |
| ILMN_2233050 | ILMN_3231550 | ILMN_1773650 | ILMN_2211780 |
| ILMN_1671661 | ILMN_1666376 | ILMN_1709233 | ILMN_1808047 |
| ILMN_2395728 | ILMN_2313889 | ILMN_1654639 | ILMN_1787844 |
| ILMN_2161286 | ILMN_2148785 | ILMN_2066849 | ILMN_1671281 |
| ILMN_1755114 | ILMN_1775692 | ILMN_1714108 | ILMN_1787509 |
| ILMN_1811049 | ILMN_1656670 | ILMN_1722981 | ILMN_1704619 |
| ILMN_3251312 | ILMN_2215382 | ILMN_1715173 | ILMN_2365465 |
| ILMN_2048811 | ILMN_3301585 | ILMN_3235176 | ILMN_1792473 |
| ILMN_2412214 | ILMN_1759628 | ILMN_1726545 | ILMN_1655561 |
| ILMN_3246255 | ILMN_2322806 | ILMN_1769082 | ILMN_1704537 |
| ILMN_1672605 | ILMN_2288483 | ILMN_1804601 | ILMN_1670305 |
| ILMN_3240177 | ILMN_1663390 | ILMN_1700604 | ILMN_2073543 |
| ILMN_1721888 | ILMN_1722025 | ILMN_2323385 | ILMN_1652199 |
| ILMN_3298410 | ILMN_1724139 | ILMN_1772261 | ILMN_1669447 |
| ILMN_3287996 | ILMN_1803143 | ILMN_1689734 | ILMN_1726289 |

|              |              |              |              |
|--------------|--------------|--------------|--------------|
| ILMN_3274790 | ILMN_2061419 | ILMN_1699570 | ILMN_1666376 |
| ILMN_1786347 | ILMN_3293146 | ILMN_1791576 | ILMN_1789510 |
| ILMN_2273224 | ILMN_1682312 | ILMN_1674661 | ILMN_2061419 |
| ILMN_2142554 | ILMN_2270845 | ILMN_2098616 | ILMN_1662524 |
| ILMN_1731203 | ILMN_1715698 | ILMN_1656287 | ILMN_1731224 |
| ILMN_2206188 | ILMN_3235410 | ILMN_1761159 | ILMN_1657423 |
| ILMN_2270845 | ILMN_3261345 | ILMN_1776104 | ILMN_3243928 |
| ILMN_2349061 | ILMN_1801307 | ILMN_1674063 | ILMN_2260991 |
| ILMN_2175894 | ILMN_1683792 | ILMN_1715131 | ILMN_1809433 |
| ILMN_2058251 | ILMN_2073012 | ILMN_1665738 | ILMN_1750321 |
| ILMN_1815578 | ILMN_3209832 | ILMN_2415786 | ILMN_2284998 |
| ILMN_1738482 | ILMN_2135272 | ILMN_1801254 | ILMN_1775498 |
| ILMN_2407851 | ILMN_1732452 | ILMN_3246805 | ILMN_1718071 |
| ILMN_2361104 | ILMN_2161286 | ILMN_1701603 | ILMN_2400759 |
| ILMN_3261345 | ILMN_2285713 | ILMN_1725417 | ILMN_1723912 |
| ILMN_2204754 | ILMN_1701789 | ILMN_1696708 | ILMN_2088437 |
| ILMN_1904980 | ILMN_2176882 | ILMN_1761721 | ILMN_2095840 |
| ILMN_1717163 | ILMN_3187425 | ILMN_2103295 | ILMN_1700428 |
| ILMN_2061419 | ILMN_1721651 | ILMN_2261416 | ILMN_1675124 |
| ILMN_1691575 | ILMN_3224907 | ILMN_2064898 | ILMN_1813625 |
| ILMN_1787378 | ILMN_1731648 | ILMN_1657361 | ILMN_1674228 |
| ILMN_3243175 | ILMN_1774334 | ILMN_1697268 | ILMN_3200414 |
| ILMN_3231550 | ILMN_3249244 | ILMN_2312709 | ILMN_1703617 |
| ILMN_1673421 | ILMN_1771385 | ILMN_2075051 | ILMN_1804601 |
| ILMN_2279367 | ILMN_1657871 | ILMN_1739345 | ILMN_1752340 |
| ILMN_1782419 | ILMN_1722059 | ILMN_2403965 | ILMN_1779486 |
| ILMN_1668092 | ILMN_1705302 | ILMN_1702177 | ILMN_1657871 |
| ILMN_3251723 | ILMN_2075794 | ILMN_1800638 | ILMN_1799765 |
| ILMN_3240236 | ILMN_1663195 | ILMN_1810838 | ILMN_1662741 |
| ILMN_2399896 | ILMN_2279834 | ILMN_1723480 | ILMN_1751072 |
| ILMN_1805778 | ILMN_3260180 | ILMN_1668559 | ILMN_1662364 |
| ILMN_1812640 | ILMN_1738678 | ILMN_1742456 | ILMN_1807074 |
| ILMN_2321931 | ILMN_1752591 | ILMN_1654939 | ILMN_1674661 |
| ILMN_2191313 | ILMN_1713706 | ILMN_1798256 | ILMN_2180352 |
| ILMN_1690921 | ILMN_1792997 | ILMN_1674402 | ILMN_1673711 |
| ILMN_1656656 | ILMN_2235745 | ILMN_2219712 | ILMN_2374159 |
| ILMN_1708414 | ILMN_1872419 | ILMN_1873034 | ILMN_1784286 |
| ILMN_2358652 | ILMN_2173004 | ILMN_1679731 | ILMN_1767514 |
| ILMN_3238053 | ILMN_3235637 | ILMN_1808395 | ILMN_1749892 |
| ILMN_1751034 | ILMN_1721704 | ILMN_1682930 | ILMN_2239754 |
| ILMN_1692177 | ILMN_1694399 | ILMN_1699214 | ILMN_2234758 |
| ILMN_1729980 | ILMN_2115949 | ILMN_2119945 | ILMN_1691436 |
| ILMN_1759075 | ILMN_2400759 | ILMN_1761260 | ILMN_1711493 |
| ILMN_2047885 | ILMN_1811049 | ILMN_1769705 | ILMN_1658383 |
| ILMN_1778599 | ILMN_1747195 | ILMN_1789074 | ILMN_2091123 |
| ILMN_1773352 | ILMN_1775522 | ILMN_2266595 | ILMN_1779324 |
| ILMN_1802380 | ILMN_2055310 | ILMN_1815054 | ILMN_1723480 |



|              |              |              |              |
|--------------|--------------|--------------|--------------|
| ILMN_2342455 | ILMN_1904980 | ILMN_2372082 | ILMN_1700604 |
| ILMN_3180420 | ILMN_3294222 | ILMN_1724333 | ILMN_1656934 |
| ILMN_1736729 | ILMN_1731203 | ILMN_1748915 | ILMN_1717809 |
| ILMN_1752899 | ILMN_1800354 | ILMN_1699160 | ILMN_3242586 |
| ILMN_3235410 | ILMN_3262849 | ILMN_1737297 | ILMN_1806165 |
| ILMN_3253787 | ILMN_2170949 | ILMN_1805228 | ILMN_3248403 |
| ILMN_1809439 | ILMN_2114568 | ILMN_1783753 | ILMN_2413084 |
| ILMN_1653466 | ILMN_1745397 | ILMN_2230862 | ILMN_1728799 |
| ILMN_3260180 | ILMN_1661346 | ILMN_2302757 | ILMN_1659227 |
| ILMN_1693789 | ILMN_3243441 | ILMN_1765941 | ILMN_3239135 |
| ILMN_2211724 | ILMN_1731048 | ILMN_1810782 | ILMN_1742001 |
| ILMN_2123559 | ILMN_2162972 | ILMN_2126706 | ILMN_1724422 |
| ILMN_1705686 | ILMN_1757742 | ILMN_1726222 | ILMN_3215461 |
| ILMN_2219618 | ILMN_1751400 | ILMN_1785570 | ILMN_3302499 |
| ILMN_2180239 | ILMN_2061043 | ILMN_2225144 | ILMN_1745397 |
| ILMN_1728298 | ILMN_1663002 | ILMN_1710514 | ILMN_3301585 |
| ILMN_3228529 | ILMN_1732705 | ILMN_1684040 | ILMN_1788607 |
| ILMN_1793549 | ILMN_1786426 | ILMN_1705064 | ILMN_1746090 |
| ILMN_1654320 | ILMN_1693789 | ILMN_2357770 | ILMN_1682312 |
| ILMN_3269655 | ILMN_1714861 | ILMN_1707695 | ILMN_1734878 |
| ILMN_1798654 | ILMN_2047599 | ILMN_2105441 | ILMN_2233050 |
| ILMN_2117569 | ILMN_2405684 | ILMN_3274904 | ILMN_3249244 |
| ILMN_3265143 | ILMN_1729294 | ILMN_2325837 | ILMN_1732071 |
| ILMN_2374244 | ILMN_1652533 | ILMN_1784737 | ILMN_1679268 |
| ILMN_3226214 | ILMN_1743829 | ILMN_1660021 | ILMN_1792885 |
| ILMN_2204909 | ILMN_1767514 | ILMN_1711566 | ILMN_3294134 |
| ILMN_1666761 | ILMN_3287996 | ILMN_1752923 | ILMN_2075794 |
| ILMN_2207505 | ILMN_1782459 | ILMN_1667371 | ILMN_1715715 |
| ILMN_3249244 | ILMN_3265742 | ILMN_2364110 | ILMN_2359907 |
| ILMN_2379718 | ILMN_1667476 | ILMN_1766275 | ILMN_1739428 |
| ILMN_2170814 | ILMN_1763386 | ILMN_1723884 | ILMN_3223126 |
| ILMN_1785703 | ILMN_2073010 | ILMN_1740160 | ILMN_1653579 |
| ILMN_1711073 | ILMN_2105033 | ILMN_3275489 | ILMN_1761945 |
| ILMN_2228196 | ILMN_2234758 | ILMN_1733421 | ILMN_2305544 |
| ILMN_3294213 | ILMN_3275590 | ILMN_1689655 | ILMN_3297126 |
| ILMN_1653432 | ILMN_1765825 | ILMN_1780189 | ILMN_2282641 |
| ILMN_2053538 | ILMN_1673138 | ILMN_1663347 | ILMN_1812105 |
| ILMN_2188119 | ILMN_1764709 | ILMN_1759436 | ILMN_3234436 |
| ILMN_2323427 | ILMN_1701114 | ILMN_2121282 | ILMN_1731418 |
| ILMN_2096012 | ILMN_2405078 | ILMN_1744508 | ILMN_1770085 |
| ILMN_2078724 | ILMN_3235148 | ILMN_1655077 | ILMN_3249658 |
| ILMN_1692956 | ILMN_1791759 | ILMN_1659544 | ILMN_1659544 |
| ILMN_3235006 | ILMN_3235853 | ILMN_1736567 | ILMN_1791328 |
| ILMN_2405684 | ILMN_2367469 | ILMN_1690561 | ILMN_1672124 |
| ILMN_1749368 | ILMN_2307740 | ILMN_3244583 | ILMN_1667371 |
| ILMN_2359907 | ILMN_3219806 | ILMN_1667561 | ILMN_3236220 |
| ILMN_2224907 | ILMN_2399896 | ILMN_1776777 | ILMN_1768482 |

|              |              |              |              |
|--------------|--------------|--------------|--------------|
| ILMN_1695851 | ILMN_1688490 | ILMN_3251658 | ILMN_1656287 |
| ILMN_3244728 | ILMN_2122511 | ILMN_1722059 | ILMN_1668270 |
| ILMN_1703695 | ILMN_3241136 | ILMN_1674243 | ILMN_1725642 |
| ILMN_3244457 | ILMN_2360784 | ILMN_2357419 | ILMN_1710937 |
| ILMN_3235637 | ILMN_2052208 | ILMN_1775708 | ILMN_1671661 |
| ILMN_2147251 | ILMN_1726460 | ILMN_1722491 | ILMN_1737157 |
| ILMN_1792997 | ILMN_1671661 | ILMN_2114568 | ILMN_1782560 |
| ILMN_1657632 | ILMN_1693552 | ILMN_1657632 | ILMN_1751330 |
| ILMN_2334242 | ILMN_1720771 | ILMN_1750101 | ILMN_1808811 |
| ILMN_1672589 | ILMN_1738642 | ILMN_3236556 | ILMN_1697268 |
| ILMN_1658290 | ILMN_1669692 | ILMN_3233442 | ILMN_1686623 |
| ILMN_1705783 | ILMN_2210386 | ILMN_1743933 | ILMN_1728163 |
| ILMN_2320964 | ILMN_1812281 | ILMN_1680453 | ILMN_1681644 |
